# Supplementary material for: Understanding and controlling the covalent functionalisation of graphene
Source: Royal Society of Chemistry journal article supplement (doi:10.1039/d0dt01589j), 2020-01-01
Supplement: d0dt01589j1.pdf [file d0dt01589j1.pdf]

## Supplementary Information

# Understanding and Controlling the Covalent Functionalisation of Graphene

Adam J. Clancy,<sup>a\*</sup> Heather Au,<sup>b</sup> Noelia Rubio,<sup>c</sup> Gabriel O. Coulter,<sup>c</sup> Milo S. P. Shaffer<sup>c\*</sup>

<sup>a</sup> Dept. Chemistry, UCL, Gower Street, London, WC1H 0AJ, U.K. \*a.clancy@ucl.ac.uk

<sup>b</sup> Dept. Chemical Engineering, Imperial College London, London, SW7 2AZ, U.K.

<sup>c</sup> Dept. Chemistry, Imperial College London, London, SW7 2AZ, U.K.

\*m.shaffer@imperial.ac.uk

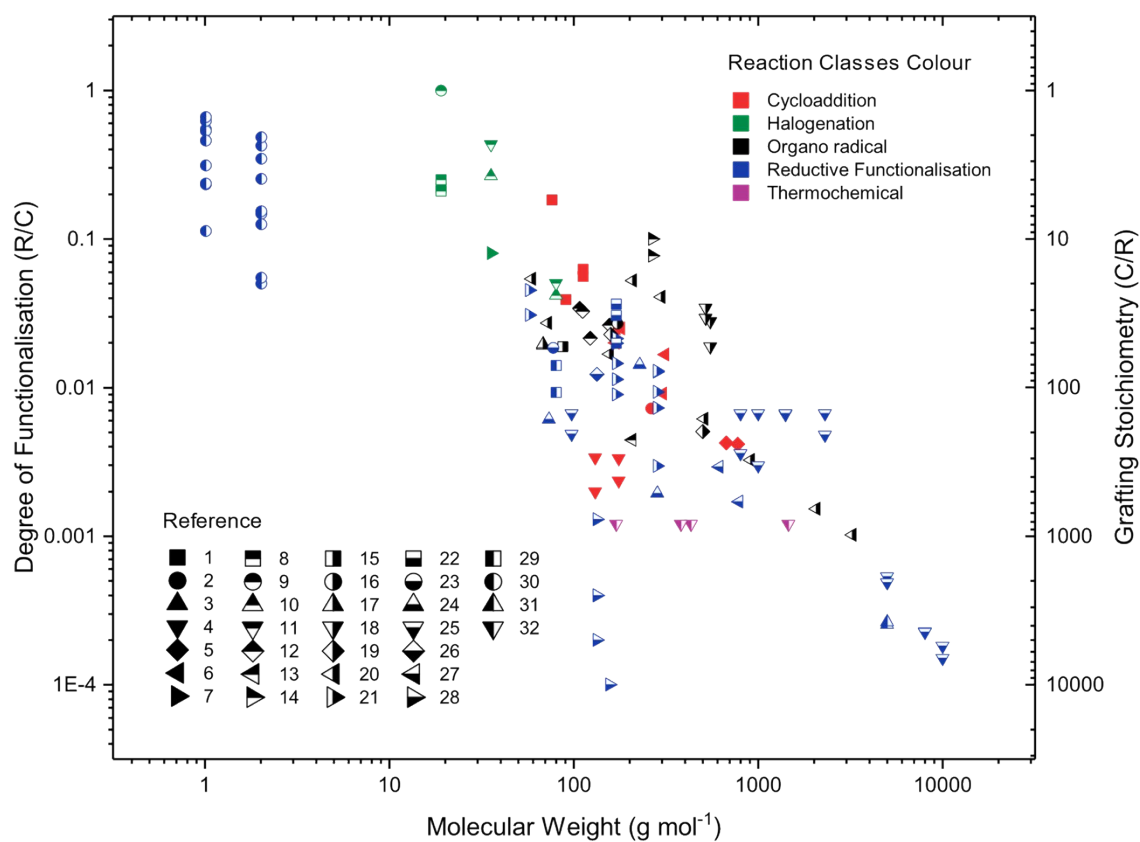

**Figure S1.** Fully annotated version of Figure 2b in the main text; Degree of functionalisation for reactions with the graphene carbon framework: summary of available literature plotting molecular weight of grafted moiety versus degree of functionalisation (R/C, left) and grafting stoichiometry (C/R, right), categorised by reaction type (by colour), annotating each data point with its respective reference.

**Table S1.** Tabulated summary of available literature data used in Figures 2b and S1 of various graphene-functionalisation reaction types, describing molecular weights of the grafted moieties and the grafting stoichiometry, as determined by either TGA or XPS, with corresponding references.

| Reaction Class                 | Mw(R)<br>(g/mol) | C/R<br>(TGA) | C/R<br>(XPS) | Reference | Reaction Class                 | Mw(R)<br>(g/mol) | C/R<br>(TGA) | C/R<br>(XPS) | Reference |
|--------------------------------|------------------|--------------|--------------|-----------|--------------------------------|------------------|--------------|--------------|-----------|
| Cycloaddition                  | 76.1             | 5.4          |              | 1         | Reductive<br>Functionalisation | 169.37           | 46.8         |              | 21        |
|                                | 112.08           | 17.8         | 16.0         |           |                                | 281.61           | 78.5         |              |           |
|                                | 90.13            | 25.5         |              | 281.61    | 107.1                          |                  |              |              |           |
|                                | 262.4            | 137.7        |              | 281.61    | 77.2                           |                  |              |              |           |
|                                | 165.21           | 41.3         |              | 169.37    | 50.3                           |                  |              | 22           |           |
|                                | 130.18           | 296.3        |              | 169.37    | 27.5                           |                  |              |              |           |
|                                | 130.18           | 501.1        |              | 169.37    | 32.8                           |                  |              |              |           |
|                                | 175.18           | 423.8        |              | 77.11     | 54.2                           |                  |              | 23           |           |
|                                | 175.18           | 299.9        |              | 73.21     | 163.4                          |                  |              |              |           |
|                                | 667.81           | 235.0        |              | 283.66    | 513.6                          |                  |              | 24           |           |
|                                | 772.21           | 240.0        |              | 227.54    | 70.1                           |                  |              |              |           |
|                                | 179.19           |              | 40.0         | 800       | 149.0                          | 278.0            |              | 25           |           |
|                                | 167.6            |              | 50.0         | 1000      | 149.0                          | 334.0            |              |              |           |
|                                | 303.49           |              | 110.0        | 1400      | 149.0                          | 151.0            |              |              |           |
|                                | 311.37           |              | 60.0         | 2300      | 149.0                          | 208.0            |              |              |           |
| Halogenation                   | 35.45            |              | 12.5         | 7         | 5000                           | 2055.0           | 1869.0       |              |           |
|                                | 19               |              | 4.0          | 8         | 8000                           | 4421.0           | 4390.0       |              |           |
|                                | 19               |              | 4.6          |           | 10000                          | 6615.0           | 5490.0       |              |           |
|                                | 19               |              | 4.8          |           | 97.02                          | 206.0            | 149.0        |              |           |
|                                | 19               |              | 1.0          | 9         | 133.23                         | 81.4             |              | 26           |           |
|                                | 35.45            |              | 3.8          | 10        | 613.77                         | 342.3            |              |              |           |
|                                | 79.9             |              | 24.0         |           | 782.13                         | 586.6            |              |              |           |
|                                | 35.45            |              | 2.3          | 11        | 133.23                         | 2500             |              | 28           |           |
|                                | 79.9             |              | 19.8         |           | 156                            | 10000            |              |              |           |
|                                | Organo radical   | 111.55       | 30.6         |           | 12                             | 133.23           | 2500         |              |           |
| 122.11                         |                  | 46.6         |              | 133.23    |                                | 5000             |              |              |           |
| 107.14                         |                  | 29.3         |              |           | 79.9                           | 71.0             | 108.0        | 29           |           |
| 156                            |                  | 38.0         |              |           | 1.01                           | 2.2              |              |              |           |
| 207.21                         |                  | 224.5        |              | 13        | 1.01                           | 1.5              |              |              |           |
| 266.33                         |                  | 10.0         | 13.0         | 14        | 1.01                           | 1.6              |              |              |           |
| 87.22                          |                  |              | 53.0         | 15        | 1.01                           | 3.2              |              |              |           |
| 171.81                         |                  | 37.0         |              | 16        | 1.01                           | 1.9              |              |              |           |
| 68.11                          |                  | 51.1         | 52.0         | 17        | 1.01                           | 1.8              |              |              |           |
| 547.16                         |                  | 35.8         | 53.0         | 18        | 1.01                           | 4.2              |              |              |           |
| 519.1                          |                  | 34.0         | 29.0         |           | 1.01                           | 8.8              |              |              |           |
| 158.17                         |                  | 44.0         |              | 19        | 1.01                           | 4.3              |              |              |           |
| 498.7                          |                  | 198.0        |              |           | 2.01                           | 6.5              |              |              |           |
| 59.08                          |                  | 18.6         |              | 20        | 2.01                           | 2.1              |              |              |           |
| 72.13                          |                  | 36.9         |              |           | 2.01                           | 2.4              |              |              |           |
| 208.07                         |                  | 19.1         |              |           | 2.01                           | 6.8              |              |              |           |
| 156.16                         |                  | 59.6         |              |           | 2.01                           | 2.9              |              |              |           |
| 297.45                         |                  | 24.6         |              |           | 2.01                           | 3.9              |              |              |           |
| 3225.17                        |                  | 980.0        |              |           | 2.01                           | 7.9              |              |              |           |
| 507.19                         |                  | 163.0        |              |           | 2.01                           | 20.0             |              |              |           |
| 907.19                         | 307.0            |              |              | 2.01      | 18.2                           |                  |              |              |           |
| 2057.19                        | 655.0            |              |              | 5000      | 3924.0                         |                  | 31           |              |           |
|                                |                  |              |              | 5000      | 3792.0                         |                  |              |              |           |
| Reductive<br>Functionalisation | 57.13            | 32.4         |              | 21        | Thermochemical                 | 169.3            | 830.0        |              | 32        |
|                                | 169.37           | 111.1        |              |           |                                | 380.38           | 830.0        |              |           |
|                                | 169.37           | 88.1         |              |           |                                | 430.91           | 830.0        |              |           |
|                                | 169.37           | 68.9         |              |           |                                | 1452.08          | 830.0        |              |           |
|                                | 281.61           | 337.5        |              |           |                                |                  |              |              |           |
|                                | 281.61           | 137.2        |              |           |                                |                  |              |              |           |
| 57.13                          | 22.1             |              |              |           |                                |                  |              |              |           |
|                                |                  |              |              |           | Oxidation                      |                  |              | 33           |           |
|                                |                  |              |              |           | Oxidation                      |                  |              | 34           |           |

When interpreting data in the literature, the following relationships were used determine C/R:

$$\frac{C}{R} = \frac{wt\%(C)}{Ar(C)} \times \frac{Mw(R)}{wt\%(R)} \quad (S1)$$

Used for TGA data where wt%(R) and wt%(C) are the weight percentages of the functional group and framework carbon (usually the remaining mass after pyrolysis), respectively; Mw(R) and Ar(C) are the molecular and atomic weights of the functional group and carbon respectively.

$$\frac{C}{R} = \frac{at\%(C) - \frac{at\%(X) \times n}{m}}{\frac{at\%(X)}{m}} \quad (S2)$$

For XPS data, for functional groups with carbon to heteroatom (X) stoichiometry  $C_nX_m$ , with at%(C) and at%(X) the atomic percentages of carbon and heteroatom respectively.

#### References:

1. X. Zhong, J. Jin, S. Li, Z. Niu, W. Hu, R. Li and J. Ma, *Chem. Commun.*, 2010, **46**, 7340-7342.
2. M. Quintana, K. Spyrou, M. Grzelczak, W. R. Browne, P. Rudolf and M. Prato, *ACS Nano*, 2010, **4**, 3527-3533.
3. V. Georgakilas, A. B. Bourlinos, R. Zboril, T. A. Steriotis, P. Dallas, A. K. Stubos and C. Trapalis, *Chem. Commun.*, 2010, **46**, 1766-1768.
4. G. Neri, A. Scala, E. Fazio, P. G. Mineo, A. Rescifina, A. Piperno and G. Grassi, *Chem. Sci.*, 2015, **6**, 6961-6970.
5. X. Zhang, L. Hou, A. Cnossen, A. C. Coleman, O. Ivashenko, P. Rudolf, B. J. van Wees, W. R. Browne and B. L. Feringa, *Chem. Eur.*, 2011, **17**, 8957-8964.
6. L. Yang and J. He, *Chem. Commun.*, 2014, **50**, 15722-15725.
7. B. Li, L. Zhou, D. Wu, H. Peng, K. Yan, Y. Zhou and Z. Liu, *ACS Nano*, 2011, **5**, 5957-5961.
8. K. I. Ho, C. H. Huang, J. H. Liao, W. Zhang, L. J. Li, C. S. Lai and C. Y. Su, *Sci. Rep.*, 2014, **4**, 5893.
9. J. T. Robinson, J. S. Burgess, C. E. Junkermeier, S. C. Badescu, T. L. Reinecke, F. K. Perkins, M. K. Zalalutdniov, J. W. Baldwin, J. C. Culbertson, P. E. Sheehan and E. S. Snow, *Nano Lett.*, 2010, **10**, 3001-3005.
10. J. Zheng, H. T. Liu, B. Wu, C. A. Di, Y. L. Guo, T. Wu, G. Yu, Y. Q. Liu and D. B. Zhu, *Sci. Rep.*, 2012, **2**, 662.
11. K. Gopalakrishnan, K. S. Subrahmanyam, P. Kumar, A. Govindaraj and C. N. R. Rao, *RSC Adv.*, 2012, **2**, 1605-1608.
12. J. R. Lomeda, C. D. Doyle, D. V. Kosynkin, W. F. Hwang and J. M. Tour, *J. Am. Chem. Soc.*, 2008, **130**, 16201-16206.
13. B. D. Ossoonon and D. Bélanger, *Carbon*, 2017, **111**, 83-93.
14. T. A. Strom, E. P. Dillon, C. E. Hamilton and A. R. Barron, *Chem. Commun.*, 2010, **46**, 4097-4099.
15. J. Choi, K. J. Kim, B. Kim, H. Lee and S. Kim, *J. Phys. Chem. C*, 2009, **113**, 9433-9435.
16. T. Sainsbury, M. Passarelli, M. Naftaly, S. Gnaniah, S. J. Spencer and A. J. Pollard, *ACS Appl. Mater. Interfaces*, 2016, **8**, 4870-4877.
17. X. Zhang, M. Han, S. Chen, L. Bao, L. Li and W. Xu, *RSC Adv.*, 2013, **3**.

18. C. E. Hamilton, J. R. Lomeda, Z. Sun, J. M. Tour and A. R. Barron, *Nano Res.*, 2010, **3**, 138-145.
19. S. P. Economopoulos, G. Rotas, Y. Miyata, H. Shinohara and N. Tagmatarchis, *ACS Nano*, 2010, **4**, 7499-7507.
20. H. K. He and C. Gao, *Chem Mater*, 2010, **22**, 5054-5064.
21. T. Morishita, A. J. Clancy and M. S. P. Shaffer, *J. Mater. Chem. A*, 2014, **2**, 15022-15028.
22. K. C. Knirsch, J. M. Englert, C. Dotzer, F. Hauke and A. Hirsch, *Chem. Commun.*, 2013, **49**, 10811-10813.
23. J. M. Englert, P. Vecera, K. C. Knirsch, R. A. Schafer, F. Hauke and A. Hirsch, *ACS Nano*, 2013, **7**, 5472-5482.
24. K. C. Knirsch, F. Hof, V. Lloret, U. Mundloch, F. Hauke and A. Hirsch, *J. Am. Chem. Soc.*, 2016, **138**, 15642-15647.
25. N. Rubio, H. Au, H. S. Leese, S. Hu, A. J. Clancy and M. S. P. Shaffer, *Macromolecules*, 2017, **50**, 7070-7079.
26. J. M. Englert, C. Dotzer, G. Yang, M. Schmid, C. Papp, J. M. Gottfried, H. P. Steinruck, E. Spiecker, F. Hauke and A. Hirsch, *Nat. Chem.*, 2011, **3**, 279-286.
27. D. Dasler, R. A. Schafer, M. B. Minameyer, J. F. Hitzemberger, F. Hauke, T. Drewello and A. Hirsch, *J. Am. Chem. Soc.*, 2017, **139**, 11760-11765.
28. F. Hof, R. A. Schafer, C. Weiss, F. Hauke and A. Hirsch, *Chem. Eur. J.*, 2014, **20**, 16644-16651.
29. H. Au, N. Rubio and M. S. P. Shaffer, *Chem. Sci.*, 2018, **9**, 209-217.
30. R. A. Schafer, D. Dasler, U. Mundloch, F. Hauke and A. Hirsch, *J. Am. Chem. Soc.*, 2016, **138**, 1647-1652.
31. H. S. Leese, L. Govada, E. Saridakis, S. Khurshid, R. Menzel, T. Morishita, A. J. Clancy, E. R. White, N. E. Chayen and M. S. P. Shaffer, *Chem. Sci.*, 2016, **7**, 2916-2923.
32. S. Hu, Z. P. L. Laker, H. S. Leese, N. Rubio, M. De Marco, H. Au, M. S. Skilbeck, N. R. Wilson and M. S. P. Shaffer, *Chem. Sci.*, 2017, **8**, 6149-6154.
33. S. Pei and H.-M. Cheng, *Carbon*, 2012, **50**, 3210-3228.
34. S. Eigler, *Chem. Commun.*, 2015, **51**, 3162-3165.
